# Supplementary material for: Sexual orientation and gender identity differences in perceptions and product appeal in response to e-cigarette advertising
Source: PubMed Central journal article supplement (PMC10472342; doi:10.18332/tid/169739), 2023-09-01
Supplement: TID-21-111-s1.pdf [file TID-21-111-s1.pdf]

**Supplemental Table 1: Adjusted associations between sexual orientation and gender identity, feature, their interaction, and outcomes (perceived advertisement effectiveness, perceived advertisement relevance, product use intention) of 2021 Brief Online Advertisement Exposure Study (N=462)**

|                                               | Beta               | 95% Confidence Interval (lower limit) | 95% Confidence Interval (upper limit) | p-value          | Overall p-value |
|-----------------------------------------------|--------------------|---------------------------------------|---------------------------------------|------------------|-----------------|
| <b>Perceived Advertisement Effectiveness†</b> |                    |                                       |                                       |                  |                 |
| <b>Flavors</b>                                |                    |                                       |                                       |                  | <b>0.004</b>    |
| Heterosexual men                              |                    |                                       |                                       |                  |                 |
| No flavors                                    | Ref                |                                       |                                       |                  |                 |
| Flavors                                       | 0.26               | -0.01                                 | 0.53                                  | 0.064            |                 |
| Heterosexual women                            |                    |                                       |                                       |                  |                 |
| No flavors                                    | Ref                |                                       |                                       |                  |                 |
| Flavors                                       | -1.00 <sup>a</sup> | -1.31                                 | -0.69                                 | <b>&lt;0.001</b> |                 |
| Sexual Minoritized men                        |                    |                                       |                                       |                  |                 |
| No flavors                                    | Ref                |                                       |                                       |                  |                 |
| Flavors                                       | -1.06 <sup>a</sup> | -1.41                                 | -0.71                                 | <b>&lt;0.001</b> |                 |
| Sexual Minoritized women                      |                    |                                       |                                       |                  |                 |
| No flavors                                    | Ref                |                                       |                                       |                  |                 |
| Flavors                                       | -0.94 <sup>a</sup> | -1.21                                 | -0.67                                 | <b>&lt;0.001</b> |                 |
| <b>Humans</b>                                 |                    |                                       |                                       |                  | <b>0.045</b>    |
| Heterosexual men                              |                    |                                       |                                       |                  |                 |
| No humans                                     | Ref                |                                       |                                       |                  |                 |
| Humans                                        | -0.13              | -0.35                                 | 0.09                                  | 0.248            |                 |
| Heterosexual women                            |                    |                                       |                                       |                  |                 |
| No humans                                     | Ref                |                                       |                                       |                  |                 |
| Humans                                        | -0.30              | -0.71                                 | 0.11                                  | 0.153            |                 |
| Sexual Minoritized men                        |                    |                                       |                                       |                  |                 |
| No humans                                     | Ref                |                                       |                                       |                  |                 |
| Humans                                        | -1.16 <sup>a</sup> | -1.65                                 | -0.67                                 | <b>&lt;0.001</b> |                 |
| Sexual Minoritized women                      |                    |                                       |                                       |                  |                 |
| No humans                                     | Ref                |                                       |                                       |                  |                 |
| Humans                                        | -0.59 <sup>a</sup> | -0.94                                 | -0.24                                 | <b>0.001</b>     |                 |
| <b>Product Packaging Shown</b>                |                    |                                       |                                       |                  | <b>0.045</b>    |
| Heterosexual men                              |                    |                                       |                                       |                  |                 |
| No product packaging                          | Ref                |                                       |                                       |                  |                 |
| Product packaging shown                       | 0.21               | -0.01                                 | 0.43                                  | 0.055            |                 |
| Heterosexual women                            |                    |                                       |                                       |                  |                 |
| No product packaging                          | Ref                |                                       |                                       |                  |                 |
| Product packaging shown                       | -0.85 <sup>a</sup> | -1.18                                 | -0.52                                 | <b>&lt;0.001</b> |                 |
| Sexual Minoritized men                        |                    |                                       |                                       |                  |                 |
| No product packaging                          | Ref                |                                       |                                       |                  |                 |
| Product packaging shown                       | -0.93 <sup>a</sup> | -1.34                                 | -0.52                                 | <b>&lt;0.001</b> |                 |
| Sexual Minoritized women                      |                    |                                       |                                       |                  |                 |
| No product packaging                          | Ref                |                                       |                                       |                  |                 |

|                                                      |                    |       |       |              |              |
|------------------------------------------------------|--------------------|-------|-------|--------------|--------------|
| Product packaging shown                              | -0.95 <sup>a</sup> | -1.24 | -0.66 | <0.001       |              |
| <b>Perceived Advertisement Relevance<sup>†</sup></b> |                    |       |       |              |              |
| <b>Flavors</b>                                       |                    |       |       |              | <b>0.031</b> |
| Heterosexual men                                     |                    |       |       |              |              |
| No flavors                                           | Ref                |       |       |              |              |
| Flavors                                              | 0.07               | -0.15 | 0.29  | 0.538        |              |
| Heterosexual women                                   |                    |       |       |              |              |
| No flavors                                           | Ref                |       |       |              |              |
| Flavors                                              | -1.10 <sup>a</sup> | -1.41 | -0.79 | <0.001       |              |
| Sexual Minoritized men                               |                    |       |       |              |              |
| No flavors                                           | Ref                |       |       |              |              |
| Flavors                                              | -1.05 <sup>a</sup> | -1.40 | -0.70 | <0.001       |              |
| Sexual Minoritized women                             |                    |       |       |              |              |
| No flavors                                           | Ref                |       |       |              |              |
| Flavors                                              | -0.85 <sup>a</sup> | -1.14 | -0.56 | <0.001       |              |
| <b>Humans</b>                                        |                    |       |       |              | <b>0.014</b> |
| Heterosexual men                                     |                    |       |       |              |              |
| No humans                                            | Ref                |       |       |              |              |
| Humans                                               | -0.13              | -0.31 | 0.05  | 0.154        |              |
| Heterosexual women                                   |                    |       |       |              |              |
| No humans                                            | Ref                |       |       |              |              |
| Humans                                               | -0.56              | -0.95 | -0.17 | <b>0.005</b> |              |
| Sexual Minoritized men                               |                    |       |       |              |              |
| No humans                                            | Ref                |       |       |              |              |
| Humans                                               | -1.27 <sup>a</sup> | -1.72 | -0.82 | <0.001       |              |
| Sexual Minoritized women                             |                    |       |       |              |              |
| No humans                                            | Ref                |       |       |              |              |
| Humans                                               | -0.76 <sup>a</sup> | -1.09 | -0.43 | <0.001       |              |
| <b>Fruit</b>                                         |                    |       |       |              | <b>0.039</b> |
| Heterosexual men                                     |                    |       |       |              |              |
| No Fruit                                             | Ref                |       |       |              |              |
| Fruit                                                | -0.23              | -0.43 | -0.03 | <b>0.029</b> |              |
| Heterosexual women                                   |                    |       |       |              |              |
| No Fruit                                             | Ref                |       |       |              |              |
| Fruit                                                | -1.07 <sup>a</sup> | -1.48 | -0.66 | <0.001       |              |
| Sexual Minoritized men                               |                    |       |       |              |              |
| No Fruit                                             | Ref                |       |       |              |              |
| Fruit                                                | -1.02 <sup>a</sup> | -1.51 | -0.53 | <0.001       |              |
| Sexual Minoritized women                             |                    |       |       |              |              |
| No Fruit                                             | Ref                |       |       |              |              |
| Fruit                                                | -0.59 <sup>a</sup> | -0.94 | -0.24 | <0.001       |              |
| <b>Product Use Intention<sup>†</sup></b>             |                    |       |       |              |              |
| <b>E-liquid Bottle Shown</b>                         |                    |       |       |              | <b>0.046</b> |
| Heterosexual men                                     |                    |       |       |              |              |
| No E-liquid Bottle                                   | Ref                |       |       |              |              |
| E-liquid Bottle                                      | -0.65              | -0.90 | -0.40 | 0.627        |              |
| Heterosexual women                                   |                    |       |       |              |              |

|                                                 |                    |       |       |                  |              |
|-------------------------------------------------|--------------------|-------|-------|------------------|--------------|
| No E-liquid Bottle                              | Ref                |       |       |                  |              |
| E-liquid Bottle                                 | -0.77 <sup>a</sup> | -1.22 | -0.32 | <b>0.001</b>     |              |
| Sexual Minoritized men                          |                    |       |       |                  |              |
| No E-liquid Bottle                              | Ref                |       |       |                  |              |
| E-liquid Bottle                                 | -0.98 <sup>a</sup> | -1.61 | -0.35 | <b>0.002</b>     |              |
| Sexual Minoritized women                        |                    |       |       |                  |              |
| No E-liquid Bottle                              | Ref                |       |       |                  |              |
| E-liquid Bottle                                 | -0.91 <sup>a</sup> | -1.30 | -0.52 | <b>&lt;0.001</b> |              |
| <b><i>“Alternative to Cigarettes” Claim</i></b> |                    |       |       |                  | <b>0.026</b> |
| Heterosexual men                                |                    |       |       |                  |              |
| No Claim                                        | Ref                |       |       |                  |              |
| “Alternative to Cigarettes” Claim               | -0.14              | -0.57 | 0.29  | 0.541            |              |
| Heterosexual women                              |                    |       |       |                  |              |
| No Claim                                        | Ref                |       |       |                  |              |
| “Alternative to Cigarettes” Claim               | -0.46              | -1.13 | 0.21  | 0.179            |              |
| Sexual Minoritized men                          |                    |       |       |                  |              |
| No Claim                                        | Ref                |       |       |                  |              |
| “Alternative to Cigarettes” Claim               | -0.46              | -1.28 | 0.36  | 0.270            |              |
| Sexual Minoritized women                        |                    |       |       |                  |              |
| No Claim                                        | Ref                |       |       |                  |              |
| “Alternative to Cigarettes” Claim               | -0.78              | -1.39 | -0.17 | <b>0.011</b>     |              |

† Because their small sample size, transgender and nonbinary participants were excluded from multivariable analyses.

\*P-values were calculated using Wald tests. Tukey’s tests were used to assess statistical significance of pairwise comparisons. P-values that meet the criteria for statistical significance are bolded. Means with a common superscript letter differ ( $p < 0.001$ ). Superscript a denotes difference compared to heterosexual men, b denotes difference compared to heterosexual women, c denotes difference compared to sexual minoritized men, and d denotes difference compared to sexual minoritized women. Models analyzed the interaction between sexual orientation and gender identity and feature, but results are only stratified by sexual orientation/gender identity when the interaction was statistically significant. Stratified results are presented from models with statistically significant interactions between sexual orientation/gender identity and feature.

**Supplemental Table 2: Participant Demographics (N=497) of 2021 Brief Online Advertisement Exposure Study, for subgroups: Heterosexual men, Heterosexual women, Gay men, Lesbian women, Bisexual men, Bisexual women, and Transgender/Nonbinary**

|                                      | Heterosexual men (n=188) | Heterosexual women (n=82) | Gay men (n=27) | Lesbian women (n=20) | Bisexual men (n=23) | Bisexual women (n=122) | Transgender/Nonbinary <sup>b</sup> (n=35) |
|--------------------------------------|--------------------------|---------------------------|----------------|----------------------|---------------------|------------------------|-------------------------------------------|
| Age; mean (sd)                       | 31.7 (11.1)              | 36.9 (9.6)                | 33.8 (10.2)    | 27.2 (9.3)           | 31.9 (10.2)         | 26.7 (8.9)             | 26.1 (8.3)                                |
| Race/ethnicity; n(%)                 |                          |                           |                |                      |                     |                        |                                           |
| Non-Hispanic White                   | 133 (70.7)               | 62 (75.6)                 | 14 (51.9)      | 12 (60.0)            | 19 (82.6)           | 84 (68.9)              | 29 (82.9)                                 |
| Non-Hispanic Black                   | 31 (16.5)                | 6 (7.3)                   | 9 (18.5)       | 2 (10.0)             | 1 (4.3)             | 11 (9.0)               | 0 (0.0)                                   |
| Hispanic                             | 10 (5.3)                 | 5 (6.1)                   | 3 (11.1)       | 1 (5.0)              | 1 (4.3)             | 9 (7.4)                | 4 (11.4)                                  |
| Other/multiple                       | 14 (7.4)                 | 9 (11.0)                  | 5 (18.5)       | 5 (0.25)             | 2 (8.7)             | 18 (14.8)              | 1 (2.9)                                   |
| Income; n (%)                        |                          |                           |                |                      |                     |                        |                                           |
| <\$50,000                            | 50 (26.6)                | 57 (69.5)                 | 15 (55.6)      | 12 (60.0)            | 10 (43.5)           | 97 (79.5)              | 29 (82.9)                                 |
| ≥\$50,000                            | 138 (73.4)               | 25 (30.5)                 | 12 (44.5)      | 8 (40.0)             | 13 (56.5)           | 25 (20.5)              | 6 (17.1)                                  |
| E-cigarette use <sup>a</sup>         |                          |                           |                |                      |                     |                        |                                           |
| Never                                | 53 (28.2)                | 35 (42.7)                 | 11 (40.7)      | 9 (45.0)             | 10 (43.5)           | 40 (32.8)              | 9 (25.7)                                  |
| Ever                                 | 26 (13.8)                | 30 (36.6)                 | 6 (22.2)       | 3 (15.0)             | 4 (17.4)            | 37 (30.3)              | 16 (45.7)                                 |
| Past 30-day                          | 109 (58.0)               | 17 (20.7)                 | 10 (37.0)      | 8 (40.0)             | 9 (39.1)            | 45 (36.9)              | 10 (28.6)                                 |
| Cigarette use                        |                          |                           |                |                      |                     |                        |                                           |
| Never                                | 35 (18.6)                | 31 (37.9)                 | 7 (25.9)       | 10 (50.0)            | 5 (21.7)            | 58 (47.5)              | 12 (34.3)                                 |
| Ever                                 | 44 (31.0)                | 31 (37.9)                 | 14 (44.4)      | 7 (35.0)             | 12 (52.2)           | 37 (30.3)              | 19 (54.3)                                 |
| Past 30-day                          | 30 (21.1)                | 20 (24.4)                 | 8 (29.6)       | 3 (15.0)             | 6 (26.1)            | 27 (22.1)              | 4 (11.4)                                  |
| Alcohol use                          |                          |                           |                |                      |                     |                        |                                           |
| Never                                | 8 (4.3)                  | 4 (0.5)                   | 0 (0.0)        | 2 (10.0)             | 3 (13.0)            | 6 (4.9)                | 1 (2.9)                                   |
| Ever                                 | 12 (6.4)                 | 14 (17.1)                 | 6 (22.2)       | 5 (25.0)             | 2 (8.7)             | 22 (18.0)              | 13 (37.1)                                 |
| Past 30-day                          | 168 (89.4)               | 64 (78.0)                 | 21 (77.8)      | 13 (65.0)            | 18 (70.3)           | 94 (77.0)              | 21 (60.2)                                 |
| Mean (sd) of Perceived Advertisement | 3.2 (1.2)                | 2.2 (1.1)                 | 2.1 (1.1)      | 2.2 (1.1)            | 1.9 (1.0)           | 2.1 (1.0)              | 2.3 (1.1)                                 |

|                                                      |           |           |           |           |           |           |           |
|------------------------------------------------------|-----------|-----------|-----------|-----------|-----------|-----------|-----------|
| Effectiveness (1-5)                                  |           |           |           |           |           |           |           |
| Mean (sd) of Perceived Advertisement Relevance (1-5) | 2.9 (1.4) | 1.6 (0.9) | 1.5 (0.9) | 1.8 (1.0) | 1.6 (0.9) | 1.6 (0.9) | 1.8 (1.1) |
| Mean (sd) of Product Use intention (1-5)             | 3.1 (1.5) | 1.7 (1.0) | 1.6 (0.9) | 1.9 (1.2) | 1.6 (1.1) | 1.8 (1.1) | 2.0 (1.2) |

<sup>a</sup>Participants were asked to report their e-cigarette use and if they had ever “used an electronic cigarette (e-cigarette), even one or two times?” If participants answered “Yes,” they were then asked, “During the past 30 days, on how many days did you use an e-cigarette?” E-cigarette use status categorized as “current use” if they used an e-cigarette in the past 30 days, “ever use” if they ever used e-cigarettes but reported 0 days of e-cigarette use in the past 30 days, and “never use” if they responded “No” to ever using an e-cigarette even one or two times. Participants also reported their use of combustible cigarettes and alcohol. We recoded participants to “current,” “ever,” and “never” users of combustible cigarettes and alcohol similar to how we categorized e-cigarette use status.

© 2023 Liu J. et al.
